# Supplementary material for: Sympathetic Nervous System Control of Carbon Tetrachloride‐Induced Oxidative Stress in Liver throughα‐Adrenergic Signaling
Source: Hindawi journal article supplement (doi:10.1155/2016/3190617), 2015-12-21
Supplement: f1 [file 3190617.f1.pdf]

## Supplementary Material

Figure S1: Effect of 6-OHDA on hepatic sympathetic innervation. Representative immunohistochemistry of sympathetic tyrosine hydroxylase nerve positive fibers of liver of mice with or without 6-OHDA. Typical images were selected from each experimental group (original magnification 200×). Scale bar = 100 μm. Arrows indicate sympathetic nerve fibers.

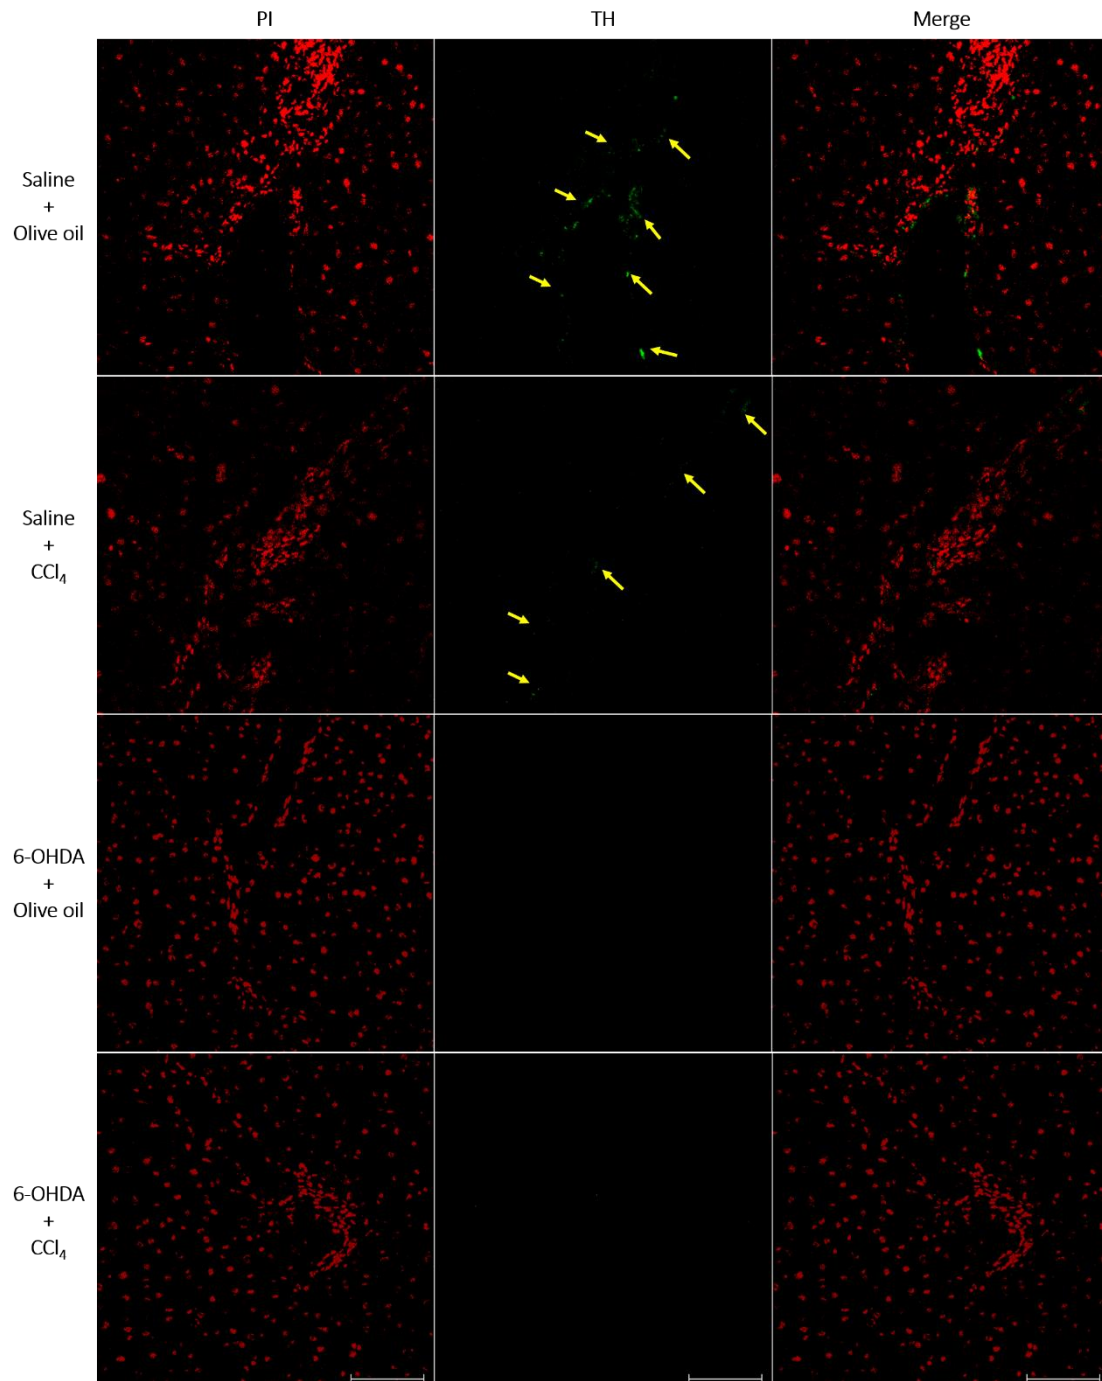

Figure S2: Effect of 6-OHDA on CCl<sub>4</sub> induced hepatic injury. Histological features (a), necrosis area (b) and severity score (c) of liver sections stained with hematoxylin and eosin 24 h after CCl<sub>4</sub> treatment. Typical images were selected from each experimental group (original magnification 40×-400×). The saline + olive oil group and the 6-OHDA + olive oil group showing normal hepatic architecture; the saline + CCl<sub>4</sub> group showing hepatocellular necrosis; the 6-OHDA + CCl<sub>4</sub> group showing mild hepatocellular necrosis. The histological changes were scored in Methods. Data plotted are mean and SD (n = 6 animals in each group). ### denotes significant differences ( $p < 0.001$ ) compared with the saline + CCl<sub>4</sub> group.

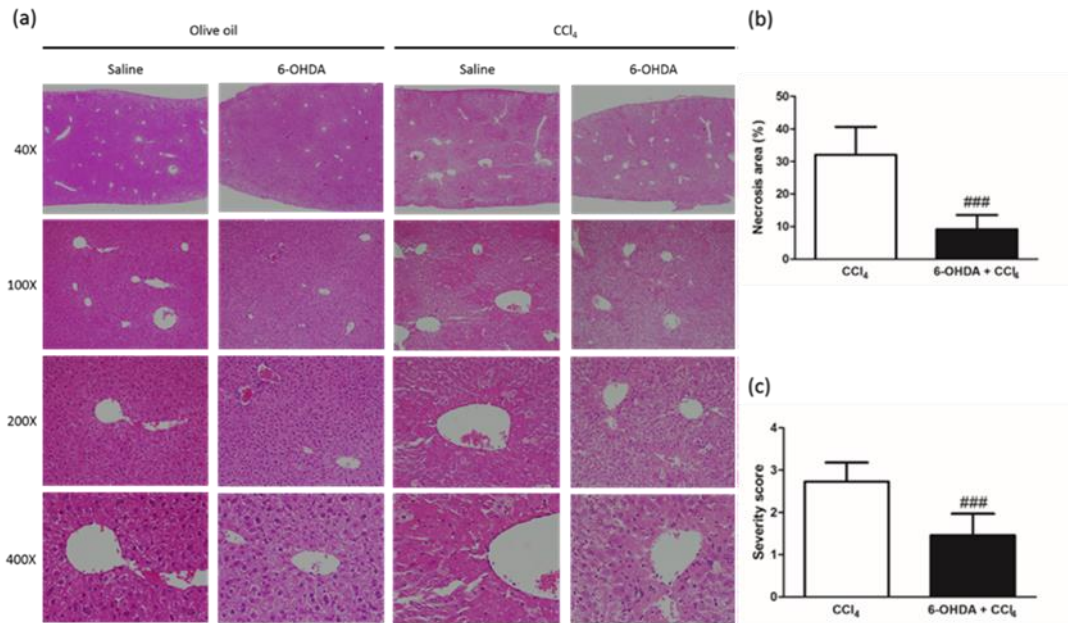

Table S1: Serum biochemical markers in mice after 24 hours of CCl<sub>4</sub> treatment with or without 6-OHDA

| Parameter                          | Saline + Olive oil<br>(n = 6) | 6-OHDA + Olive oil<br>(n = 6) | Saline + CCl <sub>4</sub><br>(n = 6) | 6-OHDA + CCl <sub>4</sub><br>(n = 6) |
|------------------------------------|-------------------------------|-------------------------------|--------------------------------------|--------------------------------------|
| Aspartate transaminase (AST, IU/L) | 134 ± 18                      | 115 ± 59                      | 17,830 ± 3,078 <sup>***</sup>        | 4,115 ± 1,755 <sup>####</sup>        |
| Alanine transaminase (ALT, IU/L)   | 40 ± 11                       | 51 ± 28                       | 15,519 ± 4,678 <sup>***</sup>        | 7,809 ± 2,527 <sup>##</sup>          |
| Alkaline phosphatase (ALP, IU/L)   | 87 ± 22                       | 59 ± 23                       | 128 ± 11 <sup>**</sup>               | 56 ± 26 <sup>##</sup>                |
| Lactate dehydrogenase (LDH, IU/L)  | 942 ± 483                     | 1,166 ± 744                   | 28,764 ± 8,063 <sup>***</sup>        | 11,139 ± 5,496 <sup>###</sup>        |

The results are presented as mean ± S.D.

<sup>\*\*</sup>Denotes significant differences compared with the Saline + Olive oil group ( $p < 0.01$ ).

<sup>\*\*\*</sup>Denotes significant differences compared with the Saline + Olive oil group ( $p < 0.001$ ).

<sup>##</sup>Denotes significant differences compared with the Saline + CCl<sub>4</sub> group ( $p < 0.01$ ).

<sup>###</sup>Denotes significant differences compared with the Saline + CCl<sub>4</sub> group ( $p < 0.001$ ).

<sup>####</sup>Denotes significant differences compared with the Saline + CCl<sub>4</sub> group ( $p < 0.0001$ ).
